## Mg<sup>2+</sup> TRANSPORT IN PLASMA MEMBRANE VESICLES OF RENAL EPITHELIUM OF THE MOZAMBIQUE TILAPIA (*OREOCHROMIS MOSSAMBICUS*)

MARCEL J. C. BIJVELDS<sup>1,2,\*</sup>, ZVONIMIR KOLAR<sup>2</sup>, SJOERD E. WENDELAAR BONGA<sup>1</sup> AND GERT FLIK<sup>1</sup>

<sup>1</sup>Department of Animal Physiology, Faculty of Science, University of Nijmegen, Toernooiveld, 6525 ED Nijmegen, The Netherlands and <sup>2</sup>Department of Radiochemistry, Interfaculty Reactor Institute, Delft University of Technology, Mekelweg 15, 2629 JB Delft, The Netherlands

Accepted 25 April 1997

### Summary

To elucidate the mechanisms involved in Mg<sup>2+</sup> transport at the apical and basolateral poles of the renal tubular epithelium, apical and basolateral plasma membrane vesicle preparations were derived from kidney tissue of freshwater- and seawater-adapted Mozambique tilapia *Oreochromis mossambicus*. Brush-border preparations were enriched 15.8-fold in alkaline phosphatase activity and consisted almost exclusively of right-side-out membrane vesicles. Basolateral membrane preparations were enriched 7.5-fold in Na<sup>+</sup>/K<sup>+</sup>-ATPase activity and contained resealed vesicles and leaky membrane fragments. Mg<sup>2+</sup> association with brush-border and basolateral plasma membranes, traced using radioactive <sup>27</sup>Mg, occurred in an osmotically active space. In all instances, Mg<sup>2+</sup> binding to the vesicular membrane was low compared with the vesicular uptake. Mg<sup>2+</sup> equilibration across the vesicular membrane of brush-border preparations was rapid and sensitive to the presence of extravesicular Ca<sup>2+</sup>, suggesting that the apical membrane

of the renal epithelium contains a transport pathway for divalent cations. Application of various ionic gradients did not affect vesicular Mg<sup>2+</sup> transport in apical and basolateral membrane preparations, suggesting the presence of an ion-coupled transport mechanism. ATP or ATP-γ-S did not stimulate Mg<sup>2+</sup> fluxes, indicating that Mg<sup>2+</sup> transport does not proceed via an ATP-driven or activated transporter. In these aspects, vesicular Mg<sup>2+</sup> transport was similar in seawater and freshwater preparations. These results suggest that the apical membrane of renal epithelial cells lacks an active secretory Mg<sup>2+</sup> transport mechanism. We propose that the Mg<sup>2+</sup> conductivity of the apical membrane reflects a route for downhill Mg<sup>2+</sup> entry and is involved in renal Mg<sup>2+</sup> reabsorption.

Key words: *Oreochromis mossambicus*, Mg<sup>2+</sup> transport, kidney, plasma membrane, brush border, ATP

### Introduction

The kidneys of fish are versatile organs, their contribution to the hydromineral balance depending on the salinity of the ambient medium. In fresh water, their main function is the excretion of excess water and the restriction of mineral losses. Salts are therefore reabsorbed by the tubular epithelium of the nephron, resulting in the production of a voluminous, plasma-hypotonic urine. Conversely, in saline environments, water is taken in by drinking and the volume of water excreted renally is substantially reduced to compensate for osmotic water loss. Excess salts taken in by diffusion across the body wall and by ingestion of sea water are excreted *via* the gills and *via* the kidneys. Whereas the gills are primarily responsible for the excretion of monovalent ions, the kidneys perform a significant role in the excretion of Mg<sup>2+</sup> and SO<sub>4</sub><sup>2-</sup> (Hickman, 1968).

In mammals, the proximal tubule and the ascending limb of the loop of Henle are the principal sections of the nephron involved in Mg<sup>2+</sup> transport (Ryan, 1990; Quamme, 1993). Mg<sup>2+</sup> reabsorption proceeds predominantly through solute-

linked, paracellular transport and is driven by the transepithelial potential (Di Stefano *et al.* 1993; De Rouffignac and Quamme, 1994). A minor transcellular component may also be involved (Ryan, 1990). In freshwater fish proximal tubules, transepithelial potentials similar to those in mammals have been reported (Nishimura and Imai, 1982) and may constitute a driving force for Mg<sup>2+</sup> reabsorption. However, reabsorption of water must be limited in freshwater fish, and this will reduce the extent to which paracellular solute-linked transport of salts occurs. Therefore, Mg<sup>2+</sup> reabsorption in fish probably involves active, transcellular transport.

For the most part, the renal excretion of Mg<sup>2+</sup> from seawater fish proceeds through tubular secretion (Hickman and Trump, 1969). The glomerular filtration rate is usually low (or glomerular filtration is even absent in aglomerular species) and accounts for only a minor portion of the total Mg<sup>2+</sup> output. Tubular Mg<sup>2+</sup> secretion results in urine Mg<sup>2+</sup> levels well above the levels in the body fluids. Net Mg<sup>2+</sup> secretion has also been

\*e-mail: gertflick@sci.kun.nl

demonstrated in isolated proximal tubules (Beyenbach, 1982; Cliff *et al.* 1986). This, together with the low potential difference across the tubular epithelium *in vivo*, suggests that electrically driven transport cannot account for the apparent  $Mg^{2+}$  accumulation in urine. It is plausible, therefore, that  $Mg^{2+}$  secretion proceeds through a transcellular, active pathway. As epithelial cells maintain a potential difference of approximately  $-60\text{ mV}$  across the luminal membrane, it is evident that the extrusion of  $Mg^{2+}$  across this barrier would require the input of metabolic energy. Intriguingly, the secretory mechanism also seems to be present in the kidneys of freshwater-adapted euryhaline species (Cliff and Beyenbach, 1992). Accordingly, freshwater-acclimated euryhaline species retain the capacity for rapid  $Mg^{2+}$  excretion. For instance, injection of freshwater trout with a large dose of  $Mg^{2+}$  leads to a sharp and instantaneous increase in urinary  $Mg^{2+}$  levels (Oikari and Rankin, 1985). This indicates that the secretory mechanisms are dormant in freshwater fish, but can be activated rapidly, probably triggered directly by the increase in plasma  $Mg^{2+}$  levels.

In seawater fish, the urinary  $Mg^{2+}$  and  $Na^+$  concentrations are inversely related, and it was suggested that  $Mg^{2+}$  secretion may be linked to  $Na^+$  transport *via* an exchange mechanism (Natochin and Gusev, 1970). The  $Na^+$  gradient across the apical membrane carries sufficient energy for uphill  $Mg^{2+}$  transport. Furthermore,  $Na^+$ -coupled  $Mg^{2+}$  transport has already been demonstrated in several other non-epithelial cell types, most notably erythrocytes (Günther and Vormann, 1985; Lüdi and Schatzmann, 1987; Flatman and Smith, 1990). Therefore, in the few attempts that have been made to elucidate the mechanism of renal  $Mg^{2+}$  secretion, attention has mainly focused on the role of  $Na^+$  (Renfro and Shustock, 1985; Cliff *et al.* 1986; Beyenbach *et al.* 1993). Although an inverse relationship between the  $Mg^{2+}$  and  $Na^+$  content of the lumen has been confirmed in isolated proximal tubules (Cliff *et al.* 1986), the presence of a  $Na^+$ -dependent  $Mg^{2+}$  transport mechanism in the luminal membrane of the tubules has never been demonstrated unequivocally.

The involvement of other mechanisms has hardly been investigated. Hentschel and Zierold (1994) demonstrated  $Mg^{2+}$ -containing secretory vesicles located at the apical pole of epithelial cells of dogfish (*Scyliorhinus caniculus*) proximal tubules.  $Mg^{2+}$  secretion through exocytosis is compatible with the inhibition of  $Mg^{2+}$  transport in isolated renal tubules of the flounder (*Pleuronectes americanus*) by cytochalasin B, which may inhibit vesicular migration (Renfro and Shustock, 1985). Other possible mechanisms would involve the coupling of  $Mg^{2+}$  translocation to downhill movement of ions other than  $Na^+$  or to ATP hydrolysis. Anion-dependent  $Mg^{2+}$  transport, for instance, has been described for Yoshida ascites tumour cells (Günther *et al.* 1986), hepatocytes (Günther and Höllriegel, 1993), erythrocytes (Günther and Vormann, 1990) and tilapia enterocytes (Bijvelts *et al.* 1996).

Studies on isolated renal tubules have been hampered by the inability to discriminate cellular from paracellular transport (Cliff and Beyenbach, 1992). To circumvent this problem, in

the present study, aspects of transcellular  $Mg^{2+}$  transport are studied at a subcellular level. We have isolated the basolateral and apical plasma membrane fractions of kidney epithelial tissue from the euryhaline teleost fish *Oreochromis mossambicus* (Mozambique tilapia).  $Mg^{2+}$  transport in isolated membrane vesicles was followed, by means of a radiotracer technique, using  $^{27}Mg$ . The presence of ATP- or ion-gradient-driven  $Mg^{2+}$  transport was investigated.

### Materials and methods

Mozambique tilapia, *Oreochromis mossambicus* (Peters), of both sexes were obtained from laboratory stock. Freshwater-adapted fish were kept in Delft tap water ( $[Mg^{2+}]=0.3\text{ mmol l}^{-1}$ ). Fish were adapted to artificial sea water (final density  $1022\text{ g l}^{-1}$ ; Wimex sea salt, Wiegandt GmbH and Co., Krefeld, Germany) over a 3 day period by gradual infusion of sea water into tanks containing fresh water. Fish were kept for at least 3 weeks in full-strength sea water before use. The water temperature was  $25\text{--}28\text{ }^{\circ}\text{C}$ , and the photoperiod was 12 h:12 h light:dark. Fish were fed Trouvit fish pellets (Trouw & Co., Putten, The Netherlands) at a daily rate of 1.5% of the fish total mass.

#### Membrane isolation

Brush-border membranes were isolated according to a modification of the method described by Booth and Kenny (1974). A fish, weighing approximately 200 g, was killed by spinal transection. The abdominal cavity was cut open lengthways, and the intestinal tract and swim-bladder removed. The kidneys were perfused *in situ* with an ice-cold isotonic solution containing  $250\text{ mmol l}^{-1}$  sucrose,  $10\text{ mmol l}^{-1}$  Hepes,  $1\text{ mmol l}^{-1}$  1,4-dithiothreitol (DTT),  $100\text{ i.u. ml}^{-1}$  aprotinin and  $100\text{ i.u. ml}^{-1}$  heparin, adjusted to pH 7.8 with Tris. All further steps were performed at  $0\text{--}4\text{ }^{\circ}\text{C}$ . Kidney tissue was gently excised and cut into slices approximately 3 mm thick. The renal tissue of two fish was pooled and disrupted using a Dounce homogeniser equipped with a loosely fitting pestle (30 strokes) in 20 ml of a hypotonic mannitol solution, containing  $10\text{ mmol l}^{-1}$  mannitol,  $1\text{ mmol l}^{-1}$  DTT,  $100\text{ i.u. ml}^{-1}$  aprotinin,  $2\text{ mmol l}^{-1}$  Tris/HCl, pH 7.4. The resulting tissue suspension was filtered over cheesecloth, and  $CaCl_2$  was added to a final concentration of  $10\text{ mmol l}^{-1}$ . Membrane precipitation was allowed to proceed for 20 min in an ice-bath under gentle stirring. The suspension was centrifuged for 10 min at  $1000\text{ g}$  (Jouan CR3000, CD4 rotor,  $2000\text{ revs min}^{-1}$ ) to remove cellular debris. After centrifugation for 10 min at  $7000\text{ g}$  (Beckman L55, 70.1 Ti rotor,  $10\,000\text{ revs min}^{-1}$ ), the resulting supernatant was centrifuged for 30 min at  $45\,000\text{ g}$  (70.1 Ti rotor,  $25\,000\text{ revs min}^{-1}$ ) to collect the plasma membrane fraction. After washing, the plasma membrane fraction was suspended in 0.3–0.5 ml of assay medium by 20 passages through a 23 gauge needle (see below for details of the composition of the assay medium). Protein concentration was determined using a commercial Coomassie Blue reagent kit (BioRad) using bovine serum albumin as a reference

(Bradford, 1976). The protein content of membrane preparations was approximately 0.6 mg ml<sup>-1</sup>. Preparations were stored for up to 3 days in liquid nitrogen.

Basolateral plasma membranes were isolated as described previously (Bijvelds *et al.* 1995). Briefly, a renal tissue homogenate in a 250 mmol l<sup>-1</sup> sucrose solution was centrifuged for 10 min at 1400 g to remove nuclei and cellular debris. The resulting supernatant was brought to 1.36 mol l<sup>-1</sup> sucrose by mixing with a concentrated sucrose solution, transferred to centrifuge tubes, and overlaid with a 250 mmol l<sup>-1</sup> sucrose solution. After centrifugation for 2 h at 154 000 g, the membranes on the interface of the sucrose solutions were collected and mixed with a solution containing the basic ingredients of the assay medium. The membranes were centrifuged for 30 min at 186,000 g, and the resulting membrane pellet was resuspended by 20 passages through a 23 gauge needle in 0.5 ml of assay medium. Membrane preparations contained approximately 2.1 mg ml<sup>-1</sup> protein.

#### Enzyme assays

The marker enzymes used were alkaline phosphatase and aminopeptidase for brush-border membranes (Pfleiderer, 1970; George and Kenny, 1973), NADH-dependent cytochrome *c* reductase for endoplasmic reticulum (Omura and Takesue, 1970), Na<sup>+</sup>/K<sup>+</sup>-ATPase for basolateral plasma membranes (Mircheff and Wright, 1976), thiamine pyrophosphatase for Golgi apparatus fragments (Novikoff and Heus, 1963) and succinic acid dehydrogenase for mitochondrial fragments (Pennington, 1961). Enzyme activities were assayed after membranes had been permeabilised with saponin (0.2 mg mg<sup>-1</sup> protein, 10 min at 25 °C) to maximise substrate accessibility.

The percentages of inside-out vesicles and right-side-out vesicles were determined on the basis of acetylcholine esterase activity and glyceraldehyde-3-phosphate-dependent dehydrogenase activity, respectively (Steck, 1974). Triton X-100, at an optimal concentration between 0.010 and 0.020 % (v/v), was used to expose enzyme activity that was masked due to resealing.

#### Production and measurement of <sup>27</sup>Mg

MgO, in which Mg was isotopically enriched in <sup>26</sup>Mg to over 97 % (Medgenics Group, Ratingen, Germany and Oak Ridge National Laboratory, Oak Ridge, TN, USA), was dissolved in diluted 'Suprapur' acetic acid (Merck, Darmstadt, Germany), resulting in a 50 mmol l<sup>-1</sup> solution of Mg(CH<sub>3</sub>COO)<sub>2</sub>. <sup>27</sup>Mg (half-life 9.46 min) was produced by irradiation of this solution in a thermal neutron flux of 4 × 10<sup>16</sup> m<sup>-2</sup> s<sup>-1</sup> for 20 min in the Interfaculty Reactor Institute nuclear reactor. The specific activity of the <sup>27</sup>Mg preparation directly after irradiation was approximately 70 GBq mol<sup>-1</sup>. Radioactivity was determined in a Tri-Carb 2750TR/LL liquid scintillation analyser (Packard Instrument Co., Meriden, CT, USA) with an energy window setting from 2 to 1755 keV. The number of counts recorded per sample ranged from 300 (lower threshold) to approximately 1500. Counting rates were corrected for background and radioactive decay. The

radiochemical purity of the <sup>27</sup>Mg preparation was assessed on the basis of the γ-ray spectrum of the irradiated solution, determined using a Ge(Li) detector and associated electronics. The absence of radioactive impurities was routinely confirmed by determination of the apparent half-life of the <sup>27</sup>Mg preparation, using liquid scintillation counting. From the decay of the <sup>27</sup>Mg preparation between 15 and 55 min after irradiation, a half-life of 9.48 ± 0.02 min was derived, a value consistent with the value of 9.46 min reported previously (Lederer and Shirley, 1978).

#### Mg<sup>2+</sup> and Ca<sup>2+</sup> transport in plasma membrane vesicle preparations

Transport of Mg<sup>2+</sup> and Ca<sup>2+</sup> was assayed by means of a rapid filtration technique (Hopfer *et al.* 1973).

Equilibrium Mg<sup>2+</sup> uptake was assayed by diluting (15×) membrane vesicle preparations loaded with 100 mmol l<sup>-1</sup> NaNO<sub>3</sub>, 100 mmol l<sup>-1</sup> mannitol, 4 mmol l<sup>-1</sup> NaCH<sub>3</sub>COO and 20 mmol l<sup>-1</sup> Hepes/Tris (pH 7.4) in assay medium containing 100 mmol l<sup>-1</sup> NaNO<sub>3</sub>, 20 mmol l<sup>-1</sup> Hepes/Tris (pH 7.4), 2.0 mmol l<sup>-1</sup> [<sup>27</sup>Mg](CH<sub>3</sub>COO)<sub>2</sub> and 50–200 mmol l<sup>-1</sup> mannitol. To assay electrodiffusive Mg<sup>2+</sup> transport, membrane vesicle preparations loaded with 100 mmol l<sup>-1</sup> mannitol, 4 mmol l<sup>-1</sup> NaCH<sub>3</sub>COO, 20 mmol l<sup>-1</sup> Hepes/Tris (pH 7.4) and either 100 mmol l<sup>-1</sup> NaNO<sub>3</sub> or 100 mmol l<sup>-1</sup> KNO<sub>3</sub> were pre-incubated with 10 μmol l<sup>-1</sup> valinomycin for 10 min on ice. Subsequently, the preparations were diluted (15×) in assay medium made up with either a high or a low KNO<sub>3</sub> concentration to create K<sup>+</sup> diffusion potentials across the vesicular membrane. Mg<sup>2+</sup> transport was assayed in the presence of 2.0 mmol l<sup>-1</sup> [<sup>27</sup>Mg](CH<sub>3</sub>COO)<sub>2</sub>.

The ATP-dependency of Mg<sup>2+</sup> efflux from brush-border membrane vesicles (BBMVs) was assayed by diluting (8×) membrane vesicle preparations loaded with 100 mmol l<sup>-1</sup> KNO<sub>3</sub>, 100 mmol l<sup>-1</sup> mannitol, 20 mmol l<sup>-1</sup> Hepes/Tris (pH 7.4), 1 mmol l<sup>-1</sup> ATP and 3.6 mmol l<sup>-1</sup> [<sup>27</sup>Mg](CH<sub>3</sub>COO)<sub>2</sub> in assay medium containing (final concentration) 100 mmol l<sup>-1</sup> KNO<sub>3</sub>, 100 mmol l<sup>-1</sup> mannitol, 0.5 mmol l<sup>-1</sup> [<sup>27</sup>Mg](CH<sub>3</sub>COO)<sub>2</sub> and 20 mmol l<sup>-1</sup> Hepes/Tris, pH 7.4. The ATP-dependency of Mg<sup>2+</sup> uptake in basolateral membrane vesicles (BLMVs) was assayed by diluting (15×) membrane vesicle preparations loaded with 100 mmol l<sup>-1</sup> KNO<sub>3</sub>, 100 mmol l<sup>-1</sup> mannitol and 20 mmol l<sup>-1</sup> Hepes/Tris (pH 7.4) in assay medium containing 100 mmol l<sup>-1</sup> KNO<sub>3</sub>, 100 mmol l<sup>-1</sup> mannitol, 1 mmol l<sup>-1</sup> ATP, 2.0 mmol l<sup>-1</sup> [<sup>27</sup>Mg](CH<sub>3</sub>COO)<sub>2</sub> and 20 mmol l<sup>-1</sup> Hepes/Tris, pH 7.4. When ATP-dependent Ca<sup>2+</sup> transport was assayed, 0.1 mmol l<sup>-1</sup> EGTA was added to buffer free Ca<sup>2+</sup>, and [<sup>27</sup>Mg](CH<sub>3</sub>COO)<sub>2</sub> was replaced by MgCl<sub>2</sub>. Plasma membrane Ca<sup>2+</sup> pump activity was assayed by adding 40 kBq ml<sup>-1</sup> [<sup>45</sup>Ca]Cl<sub>2</sub> (NEN-Du Pont, 's-Hertogenbosch, The Netherlands) to assay medium with a calculated free Ca<sup>2+</sup> concentration of 0.5 μmol l<sup>-1</sup> (adjusted using CaCl<sub>2</sub>). Thapsigargin (1 μmol l<sup>-1</sup>) was added to inhibit Ca<sup>2+</sup> transport in membrane vesicles of endoplasmic reticular origin (Bijvelds *et al.* 1995). ATP-dependent transport was defined as the difference between Mg<sup>2+</sup> and Ca<sup>2+</sup> fluxes in the

presence and absence of ATP. In the absence of ATP, 0.97 mmol<sup>-1</sup> *trans*-1,2-diaminocyclohexane-*N,N,N'*-tetraacetic acid (CDTA) was added to replace ATP as a Mg<sup>2+</sup> chelator, thus keeping total and free Mg<sup>2+</sup> concentrations equal under both conditions. In some instances, ATP was replaced by adenosine-5'-*O*-(3-thiotriphosphate) (ATP-γ-S).

The Na<sup>+</sup>-dependency of Mg<sup>2+</sup> efflux from BBMV<sub>s</sub> was assayed by diluting (8×) membrane vesicle preparations loaded with 100 mmol<sup>-1</sup> NaNO<sub>3</sub>, 100 mmol<sup>-1</sup> mannitol, 1 mmol<sup>-1</sup> ATP, 20 mmol<sup>-1</sup> Hepes/Tris (pH 7.4) and 3.6 mmol<sup>-1</sup> [<sup>27</sup>Mg](CH<sub>3</sub>COO)<sub>2</sub> in assay medium containing 87.5 mmol<sup>-1</sup> KNO<sub>3</sub>, 12.5 mmol<sup>-1</sup> NaNO<sub>3</sub>, 100 mmol<sup>-1</sup> mannitol, 0.5 mmol<sup>-1</sup> [<sup>27</sup>Mg](CH<sub>3</sub>COO)<sub>2</sub> and 20 mmol<sup>-1</sup> Hepes/Tris, pH 7.4. The Na<sup>+</sup>-dependency of Mg<sup>2+</sup> uptake in BLMV<sub>s</sub> was assayed by diluting (15×) membrane vesicle preparations loaded with 100 mmol<sup>-1</sup> NaNO<sub>3</sub>, 100 mmol<sup>-1</sup> mannitol, 20 mmol<sup>-1</sup> Hepes/Tris (pH 7.4) in assay medium containing 93.3 mmol<sup>-1</sup> KNO<sub>3</sub>, 6.7 mmol<sup>-1</sup> NaNO<sub>3</sub>, 100 mmol<sup>-1</sup> mannitol, 1 mmol<sup>-1</sup> ATP, 2.0 mmol<sup>-1</sup> [<sup>27</sup>Mg](CH<sub>3</sub>COO)<sub>2</sub> and 20 mmol<sup>-1</sup> Hepes/Tris, pH 7.4. Na<sup>+</sup>-dependent transport was defined as the difference between Mg<sup>2+</sup> fluxes in the presence and absence of a transmembrane Na<sup>+</sup> gradient, using NaNO<sub>3</sub> to replace KNO<sub>3</sub> iso-osmotically. In some instances, Triton X-100 was added (0.010 %, v/v) to disrupt the vesicular space.

The Cl<sup>-</sup>-dependency of Mg<sup>2+</sup> efflux from BBMV<sub>s</sub> was assayed by diluting (8×) membrane vesicle preparations loaded with 100 mmol<sup>-1</sup> NaCl, 100 mmol<sup>-1</sup> mannitol, 20 mmol<sup>-1</sup> Hepes/Tris (pH 7.4) and 3.6 mmol<sup>-1</sup> [<sup>27</sup>Mg](CH<sub>3</sub>COO)<sub>2</sub> in assay medium containing 87.5 mmol<sup>-1</sup> NaNO<sub>3</sub>, 12.5 mmol<sup>-1</sup> NaCl, 100 mmol<sup>-1</sup> mannitol, 0.5 mmol<sup>-1</sup> [<sup>27</sup>Mg](CH<sub>3</sub>COO)<sub>2</sub> and 20 mmol<sup>-1</sup> Hepes/Tris, pH 7.4. The Cl<sup>-</sup>-dependency of Mg<sup>2+</sup> uptake in BLMV<sub>s</sub> was assayed by diluting (15×) membrane vesicle preparations loaded with 100 mmol<sup>-1</sup> NaNO<sub>3</sub>, 100 mmol<sup>-1</sup> mannitol and 20 mmol<sup>-1</sup> Hepes/Tris (pH 7.4) in assay medium containing 93.3 mmol<sup>-1</sup> NaCl, 6.7 mmol<sup>-1</sup> NaNO<sub>3</sub>, 100 mmol<sup>-1</sup> mannitol, 2.0 mmol<sup>-1</sup>

[<sup>27</sup>Mg](CH<sub>3</sub>COO)<sub>2</sub> and 20 mmol<sup>-1</sup> Hepes/Tris, pH 7.4. Cl<sup>-</sup>-dependent transport was defined as the difference between Mg<sup>2+</sup> fluxes in the presence and absence of a transmembrane Cl<sup>-</sup> gradient, using NaNO<sub>3</sub> to replace NaCl iso-osmotically.

Incubations were carried out at 28 °C in media of 0.11 mol<sup>-1</sup> ionic strength. The free Mg<sup>2+</sup> and Ca<sup>2+</sup> concentrations were calculated according to Schoenmakers *et al.* (1992), taking into account metal ion chelation with ATP (Sillén and Martell, 1964). The reaction was quenched by addition of 1 ml of ice-cold stop buffer (150 mmol<sup>-1</sup> NaNO<sub>3</sub>, 1.5 mmol<sup>-1</sup> MgCl<sub>2</sub>, 0.1 mmol<sup>-1</sup> LaCl<sub>3</sub> and 20 mmol<sup>-1</sup> Hepes/Tris at pH 7.4) to an incubation volume of 150 μl. A volume of 1 ml was filtered on 0.45 μm ME25 membrane filters (Schleicher & Schuell, Dassel, Germany) at a reduced pressure of 75 kPa. Filters were rinsed twice with 2 ml of stop buffer and transferred to 10 ml of scintillation cocktail (Ultima Gold XR; Packard Instrument, Groningen, The Netherlands). <sup>27</sup>Mg and <sup>45</sup>Ca specific radioactivities were determined by counting the radioactivity in 0.100 ml of the remaining 'quenched reaction' suspension.

#### Calculations and statistics

Values are expressed as mean ± standard error (S.E.M.). Statistical significances of differences between means were assessed using the two-tailed Student's *t*-test and accepted at *P*<0.05.

## Results

### Membrane characterisation

In Table 1, the characteristics of the kidney plasma membrane preparation are summarised. The brush-border membrane preparation was enriched 15.8-fold in the apical membrane marker alkaline phosphatase. The alkaline phosphatase specific activity, expressed as the amount of nitrophenol formed at 37 °C and pH 10.4, was 130±14 μmol h<sup>-1</sup> mg<sup>-1</sup> protein (*N*=5). The aminopeptidase

Table 1. Relative recoveries and enrichment of marker enzymes in Mozambique tilapia kidney brush-border (BBM) and basolateral (BLM) plasma membranes

|                                         | Recovery (%) |              | Enrichment   |             |
|-----------------------------------------|--------------|--------------|--------------|-------------|
|                                         | BBM          | BLM          | BBM          | BLM         |
| Protein                                 | 0.9±0.2 (5)  | 1.9±0.2 (13) | —            | —           |
| Alkaline phosphatase                    | 13.2±0.9 (5) | 5.3±1.7 (4)  | 15.8±2.0 (5) | 4.0±0.6 (4) |
| Aminopeptidase                          | 7.3±1.1 (3)  | 3.7±0.4 (6)  | 7.3±1.2 (3)  | 2.3±0.2 (6) |
| NADH-cytochrome <i>c</i> reductase      | 1.0±0.3 (5)  | 5.4±0.9 (5)  | 1.0±0.3 (5)  | 2.8±0.5 (5) |
| Na <sup>+</sup> /K <sup>+</sup> -ATPase | 2.4±0.3 (5)  | 15.5±1.3 (5) | 2.6±0.4 (5)  | 7.5±0.4 (5) |
| Succinic acid dehydrogenase             | 0.7±0.4 (5)  | 2.5±0.4 (8)  | 0.4±0.2 (5)  | 1.3±0.3 (8) |
| Thiamine pyrophosphatase                | 3.7±0.8 (5)  | ND           | 3.0±0.4 (5)  | ND          |

Recovery was calculated as the percentage of the total activity in the plasma membrane fraction relative to the total activity in the initial tissue homogenate.

Enrichment was calculated by dividing the specific activity in the plasma membrane fraction by the specific activity in the initial tissue homogenate.

Values are means ± S.E.M. (*N*); ND, not determined.

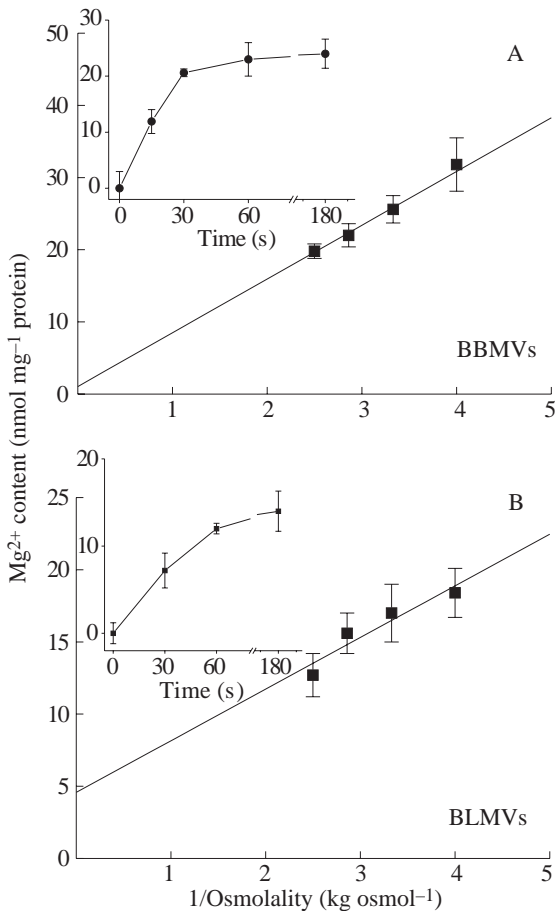

Fig. 1. Equilibrium  $Mg^{2+}$  uptake in renal plasma membrane vesicles of the Mozambique tilapia *Oreochromis mossambicus*. Preparations were incubated for 4 min in ionic media (see Materials and methods) at the osmolality indicated, in the presence of  $2.0\text{ mmol l}^{-1} Mg^{2+}$ . Regression analysis yielded the following relationship between assay medium osmolality ( $Osm$ ) and  $Mg^{2+}$  content ( $Q_{Mg}$ ) of the vesicles: (A) BBMVs, brush-border membrane vesicles:  $Q_{Mg}=1.05+7.45/Osm$  ( $P=0.005$ ;  $N=4$ ); (B) BLMVs, basolateral membrane vesicles:  $Q_{Mg}=4.58+3.58/Osm$  ( $P=0.057$ ;  $N=4$ ). The inset shows the time-dependence of  $Mg^{2+}$  uptake. Means  $\pm$  S.E.M. of three preparations are given.

activity of the brush-border membrane preparation was 7.3-fold higher than that of the initial tissue homogenate. No enrichment was observed in endoplasmic reticular and mitochondrial membrane fragments. The enzyme markers for basolateral plasma membranes ( $Na^+/K^+$ -ATPase) and Golgi apparatus (thiamine pyrophosphatase) were slightly and significantly enriched.

The percentage of right-side-out BBMVs was  $93.2\pm 1.2$  ( $N=5$ ). The membrane preparation contained virtually no inside-out vesicles ( $0.3\pm 0.2\%$ ;  $N=5$ ). From this, we calculate that approximately 6.5% of the membranes are leaky.

Enrichment and recovery of marker enzymes of the basolateral plasma membrane preparation are as reported previously (Bijvelds *et al.* 1995). The orientation of the basolateral plasma membrane preparation was  $29.1\pm 1.8\%$

Table 2. Effect of ATP, ATP- $\gamma$ -S and ion gradients on renal plasma membrane  $Mg^{2+}$  transport

|                  | $Mg^{2+}$ release from<br>BBMVs<br>(% of control) | $Mg^{2+}$ uptake by<br>BLMVs<br>(% of control) |
|------------------|---------------------------------------------------|------------------------------------------------|
| ATP              | $87\pm 9$                                         | $104\pm 2$                                     |
| ATP- $\gamma$ -S | $94\pm 6$                                         | $95\pm 8$                                      |
| $Na^+$ gradient  | $106\pm 5$                                        | $93\pm 5$                                      |
| $Cl^-$ gradient  | $99\pm 8$                                         | $98\pm 5$                                      |

The  $Mg^{2+}$  release from BBMVs and the  $Mg^{2+}$  uptake by BLMVs at 60 s are presented as percentages of the paired control value. Values are means  $\pm$  S.E.M. ( $N=8$ ).

inside-out ( $N=5$ ),  $43.9\pm 2.6\%$  right-side-out ( $N=7$ ) and, consequently, 27% leaky membranes. In BLMVs from freshwater Mozambique tilapia, a thapsigargin insensitive ATP-dependent  $Ca^{2+}$  uptake of  $3.9\pm 0.7\text{ nmol min}^{-1}\text{ mg}^{-1}$  protein ( $N=4$ ) was demonstrated, confirming that plasma membrane ion transporters remained functional after membrane isolation.

*Equilibrium Mg<sup>2+</sup> uptake*

Basal, unstimulated  $Mg^{2+}$  uptake reached a plateau after approximately 3 min (Fig. 1, inset); therefore,  $Mg^{2+}$  uptake after 4 min of incubation reflects equilibrium uptake. The dependence of equilibrium  $Mg^{2+}$  uptake on the osmolality of the suspension medium (a measure of vesicular volume) (Fig. 1) indicates that  $Mg^{2+}$  uptake is into the osmotic space. The volume-independent, membrane-bound  $Mg^{2+}$  fraction can be estimated from the y-axis intercept of the linear regression fit. At an osmolality of  $0.3\text{ osmol kg}^{-1}\text{ H}_2\text{O}$ , the  $Mg^{2+}$  uptake into the osmotic space amounted to  $23.4\pm 3.9$  and  $12.4\pm 2.0\text{ nmol mg}^{-1}\text{ protein}$  for BBMVs and BLMVs, respectively. On the basis of a free  $[Mg^{2+}]$  of  $2.0\text{ mmol l}^{-1}$ , and assuming that at equilibrium the intravesicular  $[Mg^{2+}]$  equals the extravesicular  $[Mg^{2+}]$ , we calculate a  $Mg^{2+}$  distribution space of  $11.7\pm 2.0\text{ }\mu\text{l mg}^{-1}\text{ protein}$  for BBMVs and  $6.2\pm 1.0\text{ }\mu\text{l mg}^{-1}\text{ protein}$  for BLMVs. The rate of  $Mg^{2+}$  uptake by BBMVs was reduced by  $Ca^{2+}$ : assayed at 30 s, the uptake in the presence of  $5\text{ mmol l}^{-1}\text{ Ca}^{2+}$  amounted to  $46\pm 7\%$  ( $N=8$ ;  $P<0.01$ ) of the paired control value.

$Mg^{2+}$  uptake in BBMVs was voltage-sensitive. An inwardly directed  $K^+$  gradient in the presence of valinomycin (generating an inside-positive electrical potential across the vesicular membrane) reduced the  $Mg^{2+}$  uptake to  $85.5\pm 2.3\%$  ( $N=6$ ;  $P<0.01$ ) of the paired control (no  $K^+$  gradient, but with valinomycin). An outwardly directed  $K^+$  gradient in the presence of valinomycin stimulated  $Mg^{2+}$  uptake to  $120.7\pm 7.6\%$  ( $N=6$ ;  $P<0.05$ ). In BLMVs, no voltage-dependent  $Mg^{2+}$  transport could be demonstrated.

*ATP-dependent or Na<sup>+</sup>- or Cl<sup>-</sup>-coupled Mg<sup>2+</sup> transport*

The effects of ATP and  $Na^+$  and  $Cl^-$  gradients on  $Mg^{2+}$  transport by renal plasma membrane vesicles were assayed by

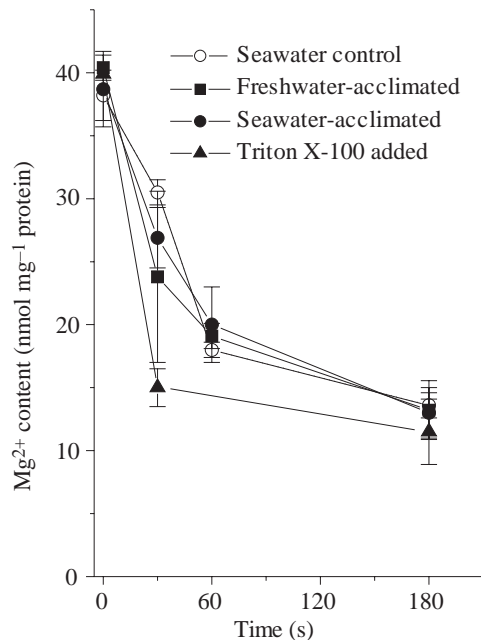

Fig. 2. Na<sup>+</sup>-driven Mg<sup>2+</sup> transport in renal BBMVs of freshwater- and seawater-adapted Mozambique tilapia *Oreochromis mossambicus*. The graphs show the time course of Mg<sup>2+</sup> efflux, in the presence (filled symbols) or absence (seawater control, open symbols) of a Na<sup>+</sup> gradient directed counter to the movement of Mg<sup>2+</sup>. Triton X-100 was added to freshwater membrane preparations to induce maximum efflux. Means  $\pm$  S.E.M. of 3–5 preparations are given.

measuring Mg<sup>2+</sup> release from BBMVs and the Mg<sup>2+</sup> uptake by BLMVs. In Table 2, the effects of these treatments are summarised. ATP at 1 mmol l<sup>-1</sup> did not stimulate Mg<sup>2+</sup> transport by renal plasma membrane vesicles. Replacement of ATP by its non-hydrolysable analogue ATP- $\gamma$ -S (1 mmol l<sup>-1</sup>) did not affect Mg<sup>2+</sup> transport significantly. Na<sup>+</sup>/Mg<sup>2+</sup> antiport activity was assayed in the presence of 1 mmol l<sup>-1</sup> ATP and a counter-directed Na<sup>+</sup> gradient to drive Mg<sup>2+</sup> efflux from BBMVs or Mg<sup>2+</sup> influx into BLMVs. Mg<sup>2+</sup> transport was not stimulated by a Na<sup>+</sup> gradient, and ATP had no effect on this process. Seawater acclimation did not stimulate Mg<sup>2+</sup> efflux from BBMVs in the presence of an inwardly directed Na<sup>+</sup> gradient (Fig. 2). Cl<sup>-</sup>-coupled Mg<sup>2+</sup> transport was assayed in the presence of a Cl<sup>-</sup> gradient directed parallel to the movement of Mg<sup>2+</sup> (Bijvelts *et al.* 1996). Neither Mg<sup>2+</sup> efflux from BBMVs nor Mg<sup>2+</sup> uptake into BLMVs was stimulated by a Cl<sup>-</sup> gradient.

### Discussion

Although *in vivo* measurements of renal fluid and urine Mg<sup>2+</sup> levels suggest the presence of an active, energy-consuming Mg<sup>2+</sup> transporter, we found no evidence for such activity in isolated plasma membrane preparations from kidney tissue. Mg<sup>2+</sup> fluxes across the basolateral and luminal membranes of the renal epithelium of the Mozambique tilapia appear to be independent of ATP and of Na<sup>+</sup> and Cl<sup>-</sup> gradients.

The demonstration of the presence of a Ca<sup>2+</sup>-sensitive Mg<sup>2+</sup> transport pathway and the absence of an active transport mechanism suggest that Mg<sup>2+</sup> moves passively across the tubular epithelium, driven by its electrochemical gradient. Whilst Mg<sup>2+</sup> absorption may indeed be driven by the prevailing electrical potential across the tubular epithelium of freshwater-acclimated fish, the low transepithelial potentials observed in Mg<sup>2+</sup>-excreting seawater fish does not support voltage-driven Mg<sup>2+</sup> secretion.

### Plasma membrane characteristics

The basolateral plasma membrane preparation used in this study was characterised by a 7.5-fold enrichment of the marker enzyme Na<sup>+</sup>/K<sup>+</sup>-ATPase and a plasma membrane Ca<sup>2+</sup>-ATPase activity that may be involved in Ca<sup>2+</sup> reabsorption (Bijvelts *et al.* 1995). This membrane fraction forms a mixed population of right-side-out and inside-out vesicles and leaky membrane sheets, in accordance with previous studies on basolateral membrane preparations from fish and mammalian kidney (Van Heeswijk *et al.* 1984; Bijvelts *et al.* 1995). The apical plasma membrane preparation, characterised by a 15.8-fold enrichment of the enzyme marker alkaline phosphatase, consists of a population of almost exclusively right-side-out vesicles, in line with a microvillar origin for these membrane fragments (Booth and Kenny, 1974). The enzyme characteristics of this preparation are very similar to those reported for trout (*Oncorhynchus mykiss*) and flounder (*Pleuronectes americanus*) renal brush-border preparations prepared using similar techniques (Renfro and Shustock, 1985; Freire *et al.* 1995).

The membrane vesicles in our preparations were osmotically active and transported Mg<sup>2+</sup> into the osmotic space. The Mg<sup>2+</sup> distribution space of BBMVs (11.7 $\pm$ 2.0  $\mu$ l mg<sup>-1</sup> protein) corresponds well with the equilibrium Mg<sup>2+</sup> uptake in BBMVs of flounder renal tubules (Renfro and Shustock, 1985), from which we calculate a distribution space of approximately 12  $\mu$ l mg<sup>-1</sup> protein at an osmolality of 0.3 osmol kg<sup>-1</sup> H<sub>2</sub>O. Taking into account that a markedly lower Mg<sup>2+</sup> concentration was used to assay Mg<sup>2+</sup> transport in the study on flounder, the characteristics of the basal Mg<sup>2+</sup> influx in renal brush-border preparations from Mozambique tilapia and flounder are comparable. However, a markedly smaller Mg<sup>2+</sup> distribution space of approximately 3  $\mu$ l mg<sup>-1</sup> protein was reported for rainbow trout (*Oncorhynchus mykiss*) renal plasma membrane vesicles, resulting in a significantly lower basal Mg<sup>2+</sup> uptake (Freire *et al.* 1996). Although a similar procedure for isolating renal plasma membranes was used, a markedly lower enrichment of alkaline phosphatase activity was observed for trout renal plasma membranes in the latter study, suggesting that the membrane preparations from trout and Mozambique tilapia differ in their enzymatic make-up and, probably, in some other aspects of membrane composition. Such differences in membrane composition may influence the vesicular volume and, consequently, the Mg<sup>2+</sup> distribution space.

We have successfully measured ATP-driven Ca<sup>2+</sup> uptake in

BLMV, demonstrating that ion-transport mechanisms in these plasma membranes remain functional after the plasma membrane isolation procedure. The Ca<sup>2+</sup> transport activity measured corresponds well with the rate of 4.04 nmol min<sup>-1</sup> mg<sup>-1</sup> protein that we calculated from the free Ca<sup>2+</sup> concentration in the assay medium (0.5 μmol l<sup>-1</sup>) and the kinetic parameters ( $V_m=4.50\pm 0.89$  nmol min<sup>-1</sup> mg<sup>-1</sup> protein,  $K_m=57\pm 17$  nmol l<sup>-1</sup>) we reported previously for Ca<sup>2+</sup> pump activities in BLMVs from renal tissue of this species (Bijvelds *et al.* 1995). In BBMVs from trout kidney and Mozambique tilapia intestine isolated using similar Ca<sup>2+</sup> (Mg<sup>2+</sup>) precipitation techniques, functional glucose (Freire *et al.* 1995) and Ca<sup>2+</sup> (Klaren *et al.* 1997) transport mechanisms, respectively, were demonstrated. Moreover, a functional anion-coupled Mg<sup>2+</sup> transporter could be demonstrated in a plasma membrane preparation from the intestine of this species (Bijvelds *et al.* 1996). We conclude, therefore, that it is unlikely that ion carriers at work *in vivo* were inactivated during the isolation procedure.

#### *Na<sup>+</sup>-coupled Mg<sup>2+</sup> transport*

We found no evidence for a Na<sup>+</sup>/Mg<sup>2+</sup> exchange mechanism in the renal basolateral or apical plasma membrane preparations of the Mozambique tilapia. A Na<sup>+</sup>/Mg<sup>2+</sup> exchange mechanism was postulated on the basis of studies on flounder which showed that tubular Mg<sup>2+</sup> transport is sensitive to ouabain and to the replacement of luminal Na<sup>+</sup> (Renfro and Shustock, 1985). Na<sup>+</sup>/Mg<sup>2+</sup> exchange controls cellular Mg<sup>2+</sup> levels in a number of cell types (reviewed by Flatman, 1984, 1991), keeping the intracellular Mg<sup>2+</sup> activity below the electrochemical equilibrium. It is unclear whether, besides its apparent 'housekeeping' function, this transporter may also be involved in transcellular Mg<sup>2+</sup> movement in Mg<sup>2+</sup>-transporting epithelia. Mg<sup>2+</sup> efflux across the renal brush border of trout is independent of luminal Na<sup>+</sup> (Beyenbach *et al.* 1993), and recently it has been shown that Mg<sup>2+</sup> transport by kidney BBMVs derived from freshwater trout is insensitive to amiloride, a blocker of Na<sup>+</sup>/Mg<sup>2+</sup> exchange (Freire *et al.* 1996). Thus, evidence for a direct dependence of renal Mg<sup>2+</sup> transport on Na<sup>+</sup> is lacking in fish. From our data, we tentatively conclude that a Na<sup>+</sup>/Mg<sup>2+</sup> exchange mechanism is not involved in renal Mg<sup>2+</sup> transport, either in freshwater or in seawater fish. Furthermore, we have shown that addition of ATP, considered to be a necessary cofactor for Na<sup>+</sup>/Mg<sup>2+</sup> exchange in some cell types (DiPolo and Beaugé, 1988; Frenkel *et al.* 1989), does not stimulate Mg<sup>2+</sup> transport. This also seems to exclude the presence of a primary active ion pump extruding Mg<sup>2+</sup> at the expense of ATP. To our knowledge no such ATPase, capable of uphill Mg<sup>2+</sup> transport, has been described in vertebrates.

#### *Anion-coupled Mg<sup>2+</sup> transport*

Anion symport may render Mg<sup>2+</sup> secretion electroneutral and may thus be a way to overcome the large potential difference across the luminal membrane opposing the efflux of positive charge. Evidently, Mg<sup>2+</sup> secretion must be

accompanied by secretion of negative charge, but it is not clear whether there is a direct relationship between Mg<sup>2+</sup> transport and anion secretion. The predominant anions secreted by the tubules are Cl<sup>-</sup>, SO<sub>4</sub><sup>2-</sup> and, depending on the nutritional intake, inorganic phosphate (Hickman and Trump, 1969). Mg<sup>2+</sup> secretion *in vitro* is independent of the presence of SO<sub>4</sub><sup>2-</sup> (Cliff *et al.* 1986), inorganic phosphate and HCO<sub>3</sub><sup>-</sup> (Renfro and Shustock, 1985) and seems to be most closely correlated with Cl<sup>-</sup> secretion (Cliff *et al.* 1986). Both the reabsorption (Nishimura and Imai, 1982) and secretion (Sawyer and Beyenbach, 1985; Cliff and Beyenbach, 1988) of Cl<sup>-</sup> are sensitive to loop diuretics such as furosemide and bumetanide, which is indicative of a (secondary) active Cl<sup>-</sup> transport mechanism. Mg<sup>2+</sup> transport by flounder renal tubules has also been shown to be sensitive to furosemide, suggesting that Mg<sup>2+</sup> secretion may be linked to Cl<sup>-</sup> secretion (Renfro and Shustock, 1985). Recently, we have demonstrated that Cl<sup>-</sup>-dependent Mg<sup>2+</sup> transport occurs in the intestinal epithelium of the Mozambique tilapia (Bijvelds *et al.* 1996). This pathway, however, is insensitive to furosemide, and in the present study we could show no effect of Cl<sup>-</sup> substitution on vesicular Mg<sup>2+</sup> fluxes. Therefore, there is no strong evidence to support a direct coupling between Cl<sup>-</sup> and Mg<sup>2+</sup> secretion in the kidney of the Mozambique tilapia.

#### *Voltage- and Ca<sup>2+</sup>-sensitive Mg<sup>2+</sup> transport*

Assuming that tubular Mg<sup>2+</sup> secretion must proceed *via* an energised, transcellular mechanism, we predicted that active Mg<sup>2+</sup> transport would occur across the apical plasma membrane of the renal epithelium. However, the present study suggests that Mg<sup>2+</sup> transport across the brush-border membrane is insensitive to ATP and to transmembrane gradients of Na<sup>+</sup> or Cl<sup>-</sup> and is mediated by a Ca<sup>2+</sup>- and voltage-sensitive Mg<sup>2+</sup> conductive pathway that allows Mg<sup>2+</sup> transport down its electrochemical gradient. It has previously been shown that tubular Mg<sup>2+</sup> transport in the marine flounder is inhibited by Ca<sup>2+</sup>, and that a transmembrane potential difference across the luminal membrane stimulates Mg<sup>2+</sup> fluxes (Renfro and Shustock, 1985). Similar Ca<sup>2+</sup>-sensitive, voltage-driven Mg<sup>2+</sup> transport has been reported for the kidney epithelium of freshwater trout (Freire *et al.* 1996). Equilibration of Mg<sup>2+</sup> across the renal brush-border membrane proceeded relatively quickly. The high Mg<sup>2+</sup> permeability observed *in vitro* may indicate the presence of a high-capacity Mg<sup>2+</sup> transport pathway in the luminal membrane of the renal epithelium. Because of the prevailing potential difference across the apical pole of the tubular cells, such a transport system could constitute a mechanism for Mg<sup>2+</sup> entry, but not for Mg<sup>2+</sup> extrusion. Therefore, its primary role may be in the regulation of cellular Mg<sup>2+</sup> concentration and/or in Mg<sup>2+</sup> reabsorption.

#### *Tubular Mg<sup>2+</sup> secretion and reabsorption*

Our data indicate that the luminal membrane of the renal epithelium lacks an active Mg<sup>2+</sup> extrusion mechanism capable of uphill Mg<sup>2+</sup> secretion. In accordance with the functional

similarity between proximal tubules from freshwater and seawater fish (Cliff and Beyenbach, 1992),  $Mg^{2+}$  fluxes were similar in freshwater and seawater vesicle preparations and no ATP-driven or ion gradient-activated  $Mg^{2+}$  transport was apparent. It has been suggested that  $Mg^{2+}$  secretion occurs *via* vesicular transport. The presence of microcrystalline aggregates in cell organelles of flounder proximal tubules and luminal fluid (Hickman and Trump, 1969), and the discovery of apically located  $Mg^{2+}$ -loaded vesicles in cells of dogfish proximal tubules (Hentschel and Zierold, 1994), indicates that  $Mg^{2+}$  may be accumulated and stored (either precipitated or glycoprotein-bound) in subcellular compartments. Although there is no sound evidence that these vesicles discharge their contents across the brush border into the tubular lumen, the presence of salt precipitates (mainly the highly insoluble phosphate salts of the divalent cations) in renal fluid and urine of  $Mg^{2+}$ -secreting fish is compatible with such a mechanism (Pitts, 1934; Hickman, 1968; Hickman and Trump, 1969; Maren *et al.* 1992).

Although  $Mg^{2+}$  secretion must be a transcellular, and thus active, process, there seems to be no obvious requirement for an active transcellular  $Mg^{2+}$  absorption route. NaCl absorption generates a lumen-positive potential difference (Nishimura and Imai, 1982) that may drive the reabsorption of divalent cations in fish renal tubules, as in the mammalian kidney (Di Stefano *et al.* 1993; Friedman and Gesek, 1993). The transport pathways described for mammalian kidney cells seem to be primarily involved in the control of cellular  $Mg^{2+}$  levels (Quamme, 1993) and, in contrast to the mechanisms described for fish kidney (Renfro and Shustock, 1985; Freire *et al.* 1996), are insensitive to high external  $Ca^{2+}$  concentrations (Quamme and Dai, 1990). As yet, no active transport mechanism has been demonstrated in mammalian kidney cells that could mediate  $Mg^{2+}$  reabsorption. We also found no evidence for an active  $Mg^{2+}$  transporter in the basolateral membrane of renal cells that could transport  $Mg^{2+}$  uphill from the cellular compartment to the peritubular fluid. Although not necessarily required for  $Mg^{2+}$  reabsorption, such a mechanism may be required for maintaining cellular  $Mg^{2+}$  homeostasis. As intracellular  $Mg^{2+}$  is strongly buffered and changes in intracellular  $Mg^{2+}$  levels are therefore moderate and occur only slowly, a mechanism of low capacity would suffice. We cannot exclude that such a transport mechanism may have gone undetected in our assays because of its low activity.

### References

- BEYENBACH, K. W. (1982). Direct demonstration of fluid secretion by glomerular renal tubules in a marine teleost. *Nature* **299**, 54–56.
- BEYENBACH, K. W., FREIRE, C. A., KINNE, R. K. H. AND KINNE-SAFFRAN, E. (1993). Epithelial transport of magnesium in the kidney of fish. *Miner. Electrolyte Metab.* **19**, 241–249.
- BIJVELDS, M. J. C., KOLAR, Z. I., WENDELAAR BONGA, S. E. AND FLIK, G. (1996). Magnesium transport across the basolateral plasma membrane of the fish enterocyte. *J. Membr. Biol.* **154**, 217–225.
- BIJVELDS, M. J. C., VAN DER HEIJDEN, A. J. H., FLIK, G., VERBOST, P. M., KOLAR, Z. I. AND WENDELAAR BONGA, S. E. (1995). Calcium pump activities in the kidneys of *Oreochromis mossambicus*. *J. exp. Biol.* **198**, 1351–1357.
- BOOTH, A. G. AND KENNY, A. J. (1974). A rapid method for the preparation of microvilli from rabbit kidney. *Biochem. J.* **142**, 575–581.
- BRADFORD, M. (1976). A rapid and sensitive method for the quantitation of microgram quantities of protein utilizing the principle of protein-dye binding. *Analyt. Biochem.* **72**, 248–254.
- CLIFF, W. H. AND BEYENBACH, K. W. (1988). Fluid secretion in glomerular renal proximal tubules of freshwater-adapted fish. *Am. J. Physiol.* **254**, R154–R158.
- CLIFF, W. H. AND BEYENBACH, K. W. (1992). Secretory renal proximal tubules in seawater- and freshwater-adapted killifish. *Am. J. Physiol.* **262**, F108–F116.
- CLIFF, W. H., SAWYER, D. B. AND BEYENBACH, K. W. (1986). Renal proximal tubule of flounder. II. Transepithelial Mg secretion. *Am. J. Physiol.* **250**, R616–R624.
- DE ROUFFIGNAC, C. AND QUAMME, G. (1994). Renal magnesium handling and its hormonal control. *Physiol. Rev.* **74**, 305–322.
- DIPOLO, R. AND BEAUGÉ, L. (1988). An ATP-dependent  $Na^+/Mg^{2+}$  countertransport is the only mechanism for  $Mg^{2+}$  extrusion in squid axons. *Biochim. biophys. Acta* **946**, 424–428.
- DI STEFANO, A., ROINEL, N., DE ROUFFIGNAC, C. AND WITTNER, M. (1993). Transepithelial  $Ca^{2+}$  and  $Mg^{2+}$  transport in the cortical thick ascending limb of Henle's loop of the mouse is a voltage-dependent process. *Renal Physiol. Biochem.* **16**, 157–166.
- FLATMAN, P. W. (1984). Magnesium transport across cell membranes. *J. Membr. Biol.* **80**, 1–14.
- FLATMAN, P. W. (1991). Mechanisms of magnesium transport. *A. Rev. Physiol.* **53**, 259–271.
- FLATMAN, P. W. AND SMITH, L. M. (1990). Magnesium transport in ferret red cells. *J. Physiol., Lond.* **431**, 11–25.
- FREIRE, C. A., KINNE, R. K. H., KINNE-SAFFRAN, E. AND BEYENBACH, K. W. (1996). Electrodifusive transport of Mg across renal membrane vesicles of the rainbow trout *Oncorhynchus mykiss*. *Am. J. Physiol.* **270**, F739–F748.
- FREIRE, C. A., KINNE-SAFFRAN, E., BEYENBACH, K. W. AND KINNE, R. K. H. (1995). Na–D-glucose cotransport in renal brush-border membrane vesicles of an early teleost (*Oncorhynchus mykiss*). *Am. J. Physiol.* **269**, R592–R602.
- FRENKEL, E. J., GRAZIANI, M. AND SCHATZMANN, H. J. (1989). ATP requirement of the sodium-dependent magnesium extrusion from human red blood cells. *J. Physiol., Lond.* **414**, 385–397.
- FRIEDMAN, P. A. AND GESEK, F. A. (1993). Calcium transport in renal epithelial cells. *Am. J. Physiol.* **264**, F181–F198.
- GEORGE, S. G. AND KENNY, A. J. (1973). Studies on the enzymology of purified preparations of brush border from rabbit kidney. *Biochem. J.* **134**, 43–57.
- GÜNTHER, T. AND HÖLLRIEGL, V. (1993).  $Na^+$ - and anion-dependent  $Mg^{2+}$  influx in isolated hepatocytes. *Biochim. biophys. Acta* **1149**, 49–54.
- GÜNTHER, T. AND VORMANN, J. (1985).  $Mg^{2+}$  efflux is accomplished by an amiloride-sensitive  $Na^+/Mg^{2+}$  antiport. *Biochem. biophys. Res. Commun.* **130**, 540–545.
- GÜNTHER, T. AND VORMANN, J. (1990). Characterization of  $Na^+$ -independent  $Mg^{2+}$  efflux from erythrocytes. *FEBS Lett.* **271**, 149–151.
- GÜNTHER, T., VORMANN, J. AND AVERDUNK, R. (1986). Characterization of furosemide-sensitive  $Mg^{2+}$  influx in Yoshida ascites tumor cells. *FEBS Lett.* **197**, 297–300.
- HENTSCHEL, H. AND ZIEROLD, K. (1994). Morphology and element



- distribution of magnesium-secreting epithelium: the proximal tubule segment PII of dogfish, *Scyliorhinus caniculus* (L.). *Eur. J. Cell Biol.* **63**, 32–42.
- HICKMAN, C. P., JR (1968). Urine composition and kidney tubular function in southern flounder, *Paralichthys lethostigma*, in seawater. *Can. J. Zool.* **46**, 439–455.
- HICKMAN, C. P., JR AND TRUMP, B. R. (1969). The kidney. In *Fish Physiology*, vol. 1, *Excretion, Ionic Regulation and Metabolism* (ed. W. S. Hoar and D. J. Randall), pp. 91–239. New York: Academic Press.
- HOPFER, U., NELSON, K., PERROTTO, J. AND ISSELBACHER, K. J. (1973). Glucose transport in isolated brush border membrane from rat small intestine. *J. biol. Chem.* **248**, 25–32.
- KLAREN, P. H. M., WENDELAAR BONGA, S. E. AND FLIK, G. (1997). Evidence for P<sub>2</sub>-purinoreceptor-mediated uptake of Ca<sup>2+</sup> across a fish (*Oreochromis mossambicus*) intestinal brush border membrane. *Biochem. J.* **322**, 129–134.
- LEDERER, C. M. AND SHIRLEY, V. S. (1978). *Table of Isotopes*, 7th edn. New York: John Wiley & Sons.
- LÜDI, H. AND SCHATZMANN, H. J. (1987). Some properties of a system for sodium-dependent outward movement of magnesium from metabolizing human red blood cells. *J. Physiol., Lond.* **390**, 367–382.
- MAREN, T. H., FINE, A., SWENSON, E. R. AND ROTHMAN, D. (1992). Renal acid–base physiology in marine teleost, the long-horned sculpin (*Myoxocephalus octodecimspinosus*). *Am. J. Physiol.* **263**, F49–F55.
- MIRCHEFF, A. K. AND WRIGHT, E. M. (1976). Analytical isolation of plasma membranes of intestinal epithelial cells: identification of Na,K-ATPase rich membranes and the distribution of enzyme activities. *J. Membr. Biol.* **28**, 309–333.
- NATOCHIN, Y. V. AND GUSEV, G. P. (1970). The coupling of magnesium secretion to sodium reabsorption in the kidney of teleost. *Comp. Biochem. Physiol.* **37**, 107–111.
- NISHIMURA, H. AND IMAI, M. (1982). Control of renal function in freshwater and marine teleosts. *Fedn Proc. Fedn Am. Socs exp. Biol.* **41**, 2355–2360.
- NOVIKOFF, A. B. AND HEUS, M. (1963). A microsomal nucleoside diphosphatase. *J. biol. Chem.* **238**, 710–716.
- OIKARI, A. O. J. AND RANKIN, J. C. (1985). Renal excretion of magnesium in a freshwater teleost, *Salmo gairdneri*. *J. exp. Biol.* **117**, 319–333.
- OMURA, T. AND TAKESUE, S. (1970). A new method for simultaneous purification of cytochrome b<sub>5</sub> and NADPH–cytochrome c reductase from rat liver microsomes. *J. Biochem.* **67**, 249–257.
- PENNINGTON, R. S. (1961). Biochemistry of dystrophic muscle mitochondrial succinatetetrazolium reductase and adenosine triphosphatase. *Biochem. J.* **80**, 644–654.
- PFLIEDERER, G. (1970). Particle-bound aminopeptidase from pig kidney. *Meth. Enzymol.* **19**, 514–521.
- PITTS, R. F. (1934). Urinary composition in marine fish. *J. cell. comp. Physiol.* **4**, 389–395.
- QUAMME, G. (1993). Magnesium homeostasis and renal magnesium handling. *Miner. Electrolyte Metab.* **19**, 218–225.
- QUAMME, G. A. AND DAI, L.-J. (1990). Presence of a novel influx pathway for magnesium ion in MDCK cells. *Am. J. Physiol.* **259**, C521–C525.
- RENFRO, J. L. AND SHUSTOCK, E. (1985). Peritubular uptake and brush border transport of <sup>28</sup>Mg by flounder renal tubules. *Am. J. Physiol.* **249**, F497–F506.
- RYAN, M. P. (1990). The renal handling of magnesium. In *Metal Ions in Biological Systems*, 1st edn, vol. 26 (ed. H. Sigel and A. Sigel), pp. 227–248. New York: Marcel Dekker.
- SAWYER, D. B. AND BEYENBACH, K. W. (1985). Mechanism of fluid secretion in isolated shark renal proximal tubules. *Am. J. Physiol.* **249**, F884–F890.
- SCHOENMAKERS, T. J. M., VISSER, G. J., FLIK, G. AND THEUVENET, A. P. R. (1992). CHELATOR: an improved method for computing metal ion concentrations in physiological solutions. *BioTechniques* **12**, 870–879.
- SILLÉN, L. G. AND MARTELL, A. E. (1964). *Stability Constants of Ion–Metal Complexes. Special Publication no.17*. London: The Chemical Society.
- STECK, T. L. (1974). Preparation of impermeable inside-out and right-side-out vesicles from erythrocyte membranes. In *Methods in Membrane Biology*, vol. 2 (ed. E. D. Korn), pp. 245–281. New York: Plenum Press.
- VAN HEESWIJK, M. P. E., GEERTSEN, J. A. M. AND VAN OS, C. H. (1984). Kinetic properties of the ATP-dependent Ca<sup>2+</sup> pump and the Na<sup>+</sup>/Ca<sup>2+</sup> exchange system in basolateral membranes from rat kidney cortex. *J. Membr. Biol.* **79**, 19–31.
